# Supplementary material for: Differential effects of light and feeding on circadian organization of peripheral clocks in a forebrain Bmal1 mutant
Source: eLife journal article supplement (doi:10.7554/elife.04617), 2014-12-19
Supplement: supp [file elife_poa_e04617_Figure_5_source_data_3.docx]

Figure 5-source data 3. Statistical analysis of circular variance for peak bioluminescence in individual mice in DD. Shown are mean vector, circular SD, and circular variance of pituitary, liver, kidney, heart, lung, spleen in an individual mouse. Mann Whitney test for circular variances between Fx/Fx WT control and BKO mice shows P = 0.0008.

| **DD** | Mean Vector (˚) | Circular SD (˚) | Circular Variance | **DD** | Mean Vector (˚) | Circular SD (˚) | Circular Variance |
| --- | --- | --- | --- | --- | --- | --- | --- |
| WT1 | 273.267 | 29.843 | 0.127 | BKO1 | 239.182 | 77.500 | 0.599 |
| WT2 | 279.294 | 29.745 | 0.126 | BKO2 | 208.472 | 70.139 | 0.527 |
| WT3 | 269.610 | 28.933 | 0.120 | BKO3 | 298.810 | 78.411 | 0.608 |
| WT4 | 270.046 | 20.862 | 0.064 | BKO4 | 228.296 | 111.62 | 0.850 |
| WT5 | 283.940 | 31.081 | 0.137 | BKO5 | 244.754 | 42.192 | 0.237 |
| WT6 | 266.336 | 20.951 | 0.065 | BKO6 | 306.551 | 17.719 | 0.047 |
| WT7 | 287.150 | 30.323 | 0.131 | BKO7 | 333.693 | 49.480 | 0.311 |
| WT8 | 288.374 | 26.706 | 0.103 | BKO8 | 127.841 | 116.69 | 0.874 |
| WT9 | 284.170 | 32.114 | 0.145 | BKO9 | 247.351 | 58.557 | 0.407 |
| WT10 | 260.029 | 37.264 | 0.191 | BKO10 | 211.410 | 46.927 | 0.285 |
| WT11 | 256.687 | 36.862 | 0.187 | BKO11 | 247.354 | 66.450 | 0.490 |
| WT12 | 266.210 | 38.528 | 0.202 | BKO12 | 226.177 | 37.676 | 0.194 |
| WT13 | 271.928 | 24.866 | 0.090 | BKO13 | 231.743 | 36.627 | 0.185 |
| WT14 | 260.422 | 36.517 | 0.184 | BKO14 | 249.592 | 55.446 | 0.374 |
| WT15 | 271.627 | 19.944 | 0.059 | BKO15 | 241.825 | 24.771 | 0.089 |
