# Supplementary material for: Differential effects of light and feeding on circadian organization of peripheral clocks in a forebrain Bmal1 mutant
Source: eLife journal article supplement (doi:10.7554/elife.04617), 2014-12-19
Supplement: supp [file elife_poa_e04617_Figure_9_source_data_1.docx]

Figure 9-source data 1. Summary of statistical comparison of peak phases from Fx/Fx mice under different conditions.

All parameters were presented in previous Tables. Watson-Williams F-test was performed to compare the mean phase angle in each tissue from Fx/Fx mice under different conditions. Variance (distribution of peak phase values) was compared by bootstrapping to estimate P-values for each comparison.

| **Fx/Fx LD vs DD** | | Pituitary | Liver | Kidney | Heart | Lung | Spleen |
| --- | --- | --- | --- | --- | --- | --- | --- |
| Watson-Williams F-test | |  |  |  |  |  |  |
| P value |  | 0.106 | **5.30E-4** | **0.007** | **0.005** | **0.040** | 0.167 |
| Comparison of variance | |  |  |  |  |  |  |
| P value | for LD > DD | **0.0199** |  | 0.1321 |  | 0.3119 | **0.0434** |
|  | for LD < DD |  | **0.0137** |  | 0.1194 |  |  |
| **Fx/Fx LD vs DD+FR ZT** | | Pituitary | Liver | Kidney | Heart | Lung | Spleen |
| Watson-Williams F-test | |  |  |  |  |  |  |
| P value |  | **0.020** | **3.42E-4** | **9.18E-4** | **0.020** | **0.009** | **0.003** |
| Comparison of variance | |  |  |  |  |  |  |
| P value | for LD < DD+FR | **0.0025** | **0.0020** | **0.0020** | **0.0001** | **0.0001** | **0.0000** |
| **Fx/Fx DD vs DD+FR CT** | | Pituitary | Liver | Kidney | Heart | Lung | Spleen |
| Watson-Williams F-test | |  |  |  |  |  |  |
| P value |  | 0.356 | **3.51E-4** | **6.09E-4** | **0.005** | 0.444 | 0.152 |
| Comparison of variance | |  |  |  |  |  |  |
| P value | for DD < DD+FR | **0.0215** | **0.0253** | 0.4905 | 0.5278 | 0.4054 | 0.1366 |
