# Supplementary material for: Differential effects of light and feeding on circadian organization of peripheral clocks in a forebrain Bmal1 mutant
Source: eLife journal article supplement (doi:10.7554/elife.04617), 2014-12-19
Supplement: supp [file elife_poa_e04617_Figure_9_source_data_2.docx]

Figure 9-source data 2. Summary of statistical comparison of peak phases from BKO mice under different conditions.

All parameters were presented in previous Tables. Watson-Williams F-test was performed to compare the mean phase angle in each tissue from BKO mice under different conditions. Variance (distribution of peak phase values) was compared by bootstrapping to estimate P-values for each comparison.

| **BKO LD vs DD** | | Pituitary | Liver | Kidney | Heart | Lung | Spleen |
| --- | --- | --- | --- | --- | --- | --- | --- |
| Watson-Williams F-test | |  |  |  |  |  |  |
| P value |  | 0.173 | 0.309 | **0.030** | 0.113 | 0.170 | 0.672 |
| Comparison of variance | |  |  |  |  |  |  |
| P value | for LD < DD | **0.0150** | **0.0000** | **0.0009** | **0.0083** | **0.0190** | **0.0118** |
| **BKO LD vs DD+FR** | | Pituitary | Liver | Kidney | Heart | Lung | Spleen |
| Watson-Williams F-test | |  |  |  |  |  |  |
| P value |  | **0.007** | **1.28E-7** | **< 1E-12** | **5.09E-9** | **4.07E-10** | **2.58E-7** |
| Comparison of variance | |  |  |  |  |  |  |
| P value | for LD > DD+FR |  | 0.4077 | **0.0179** |  |  |  |
|  | for LD < DD+FR | **0.0483** |  |  | **0.0018** | 0.0527 | **0.0020** |
| **BKO DD vs DD+FR** | | Pituitary | Liver | Kidney | Heart | Lung | Spleen |
| Watson-Williams F-test | |  |  |  |  |  |  |
| P value |  | 0.301 | 0.246 | **3.39E-9** | **2.03E-7** | **2.50E-7** | **7.00E-6** |
| Comparison of variance | |  |  |  |  |  |  |
| P value | for DD > DD+FR | 0.1857 | **0.0000** | **0.0000** | 0.5628 | 0.4693 | 0.8642 |
