# Supplementary figures and images for: Differential effects of light and feeding on circadian organization of peripheral clocks in a forebrain Bmal1 mutant
Source: eLife journal article supplement (doi:10.7554/elife.04617), 2014-12-19

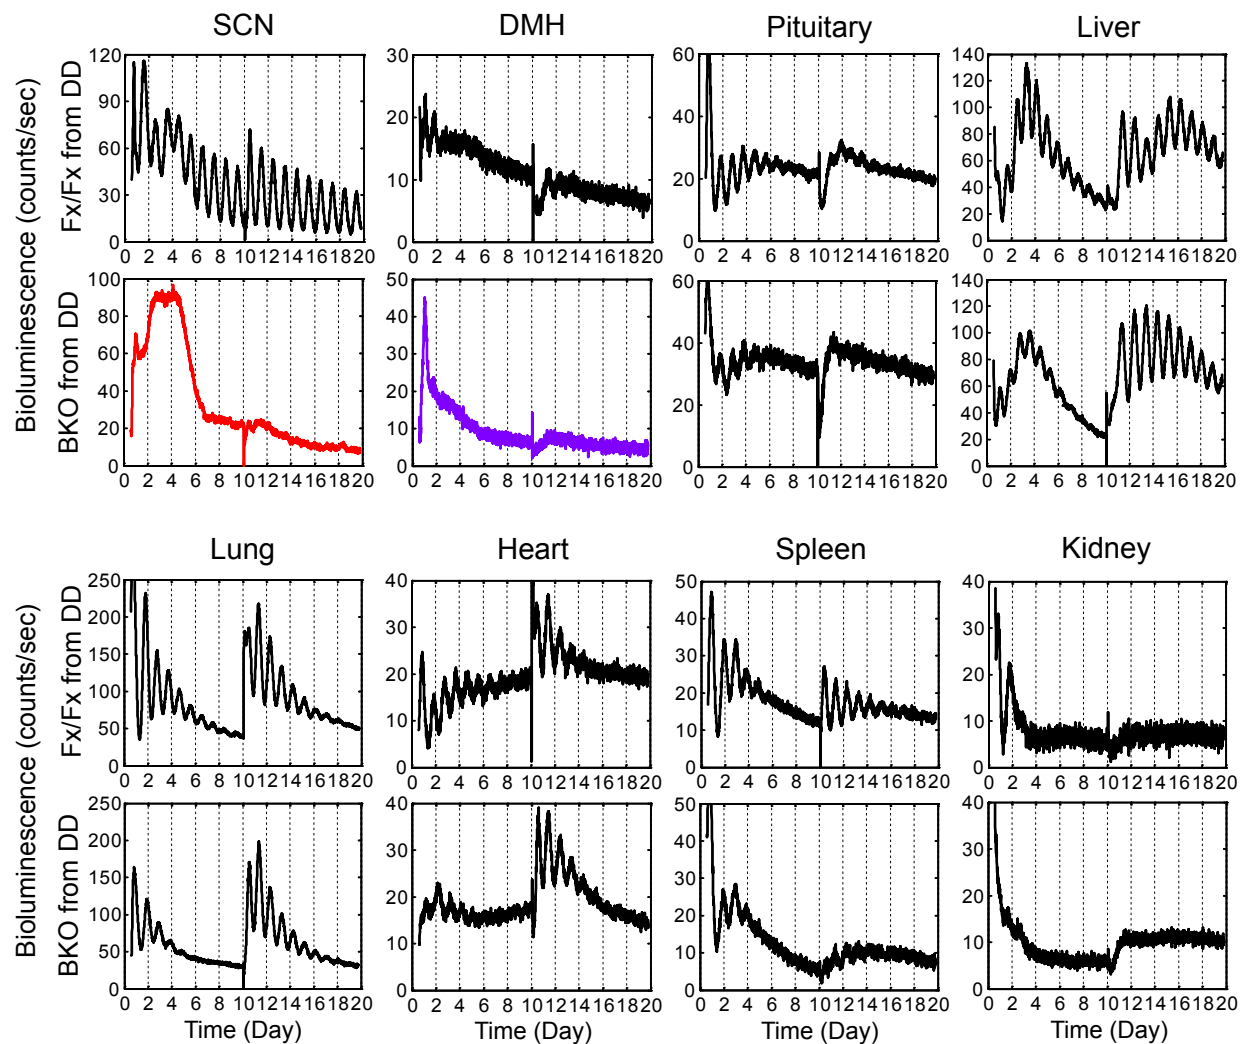

Supplement: supp [file elife-04617-supp-v1.zip]

**A**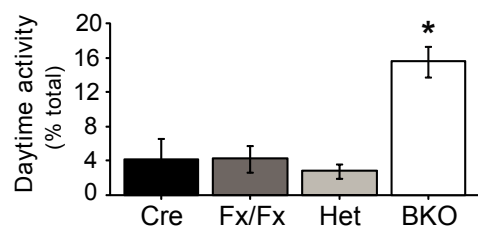**B**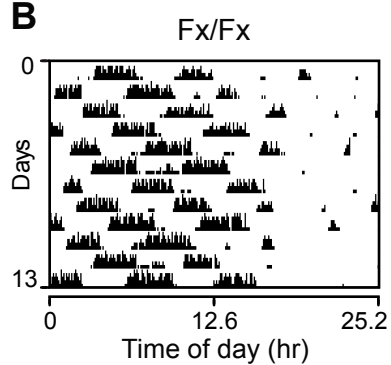**C**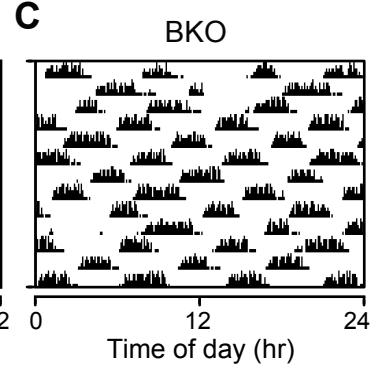**D**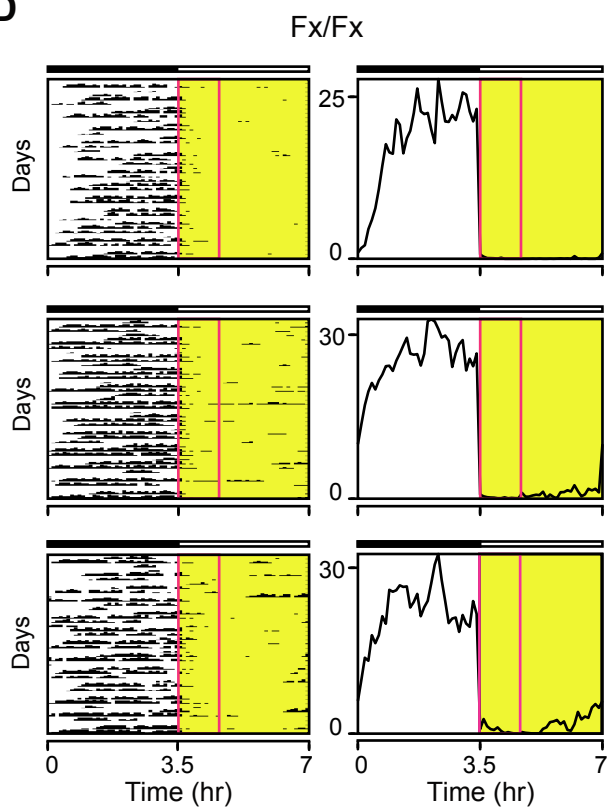**E**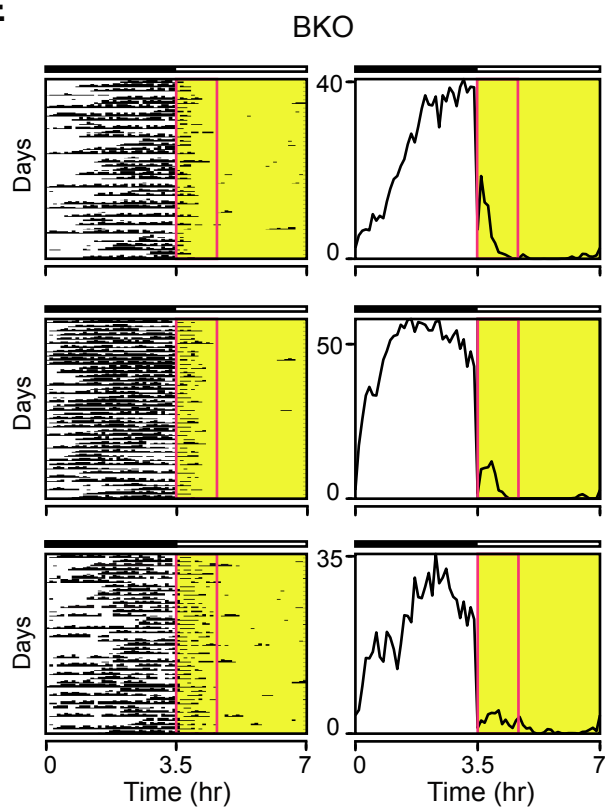

Supplement: supp [file elife-04617-supp-v1.zip]

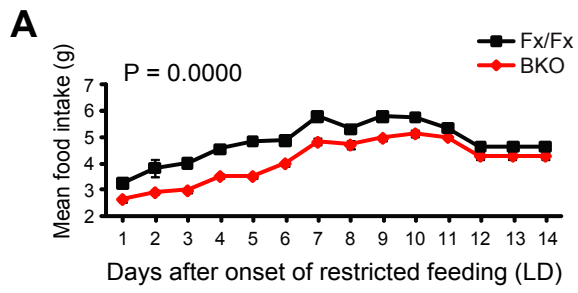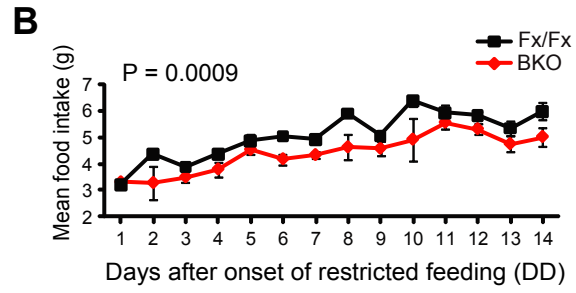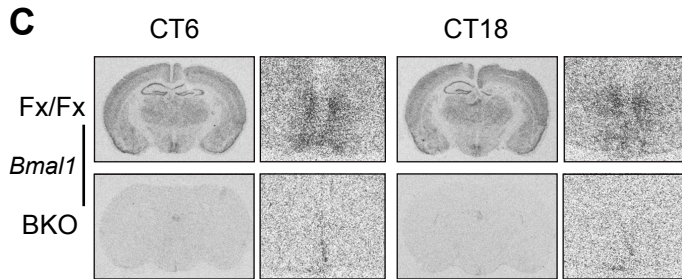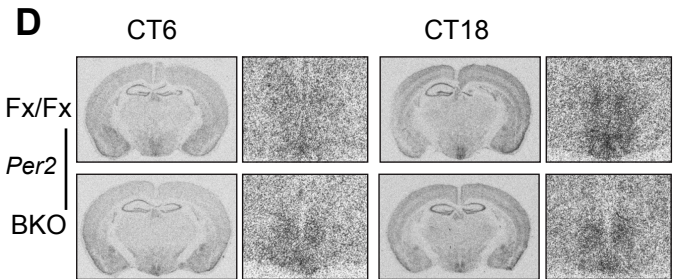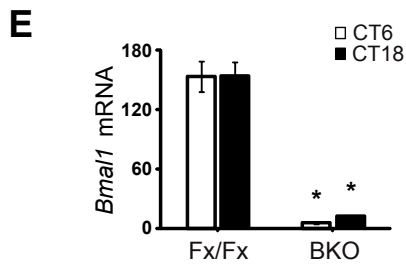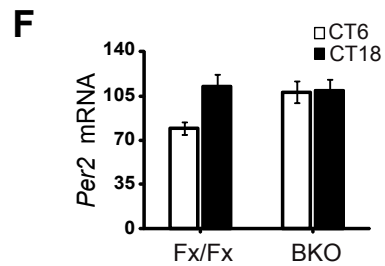

Supplement: supp [file elife-04617-supp-v1.zip]

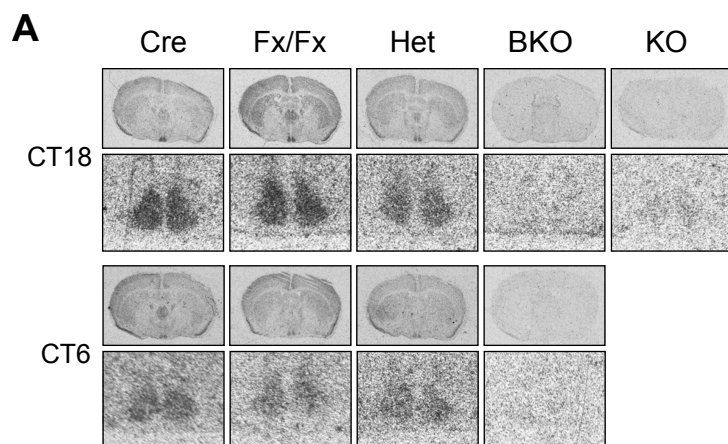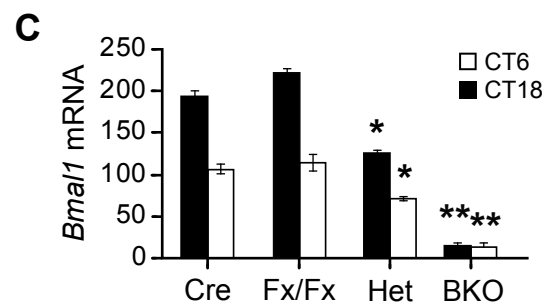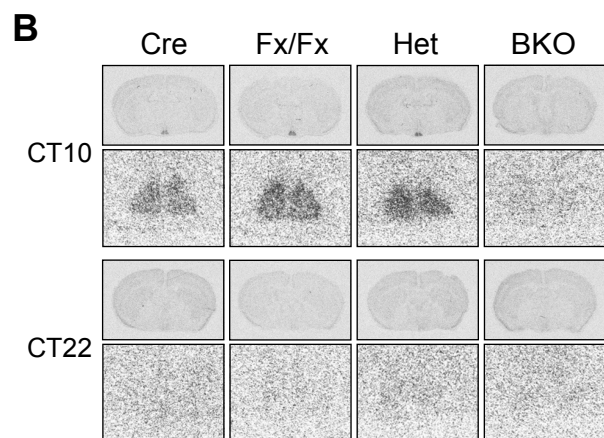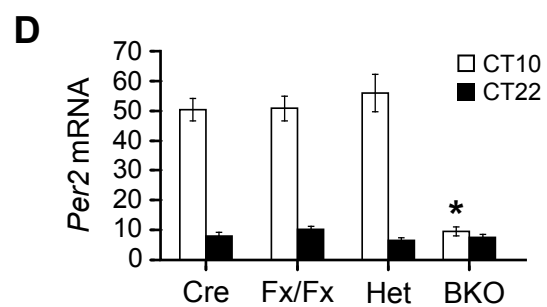

Supplement: supp [file elife-04617-supp-v1.zip]

## Male Body Weights

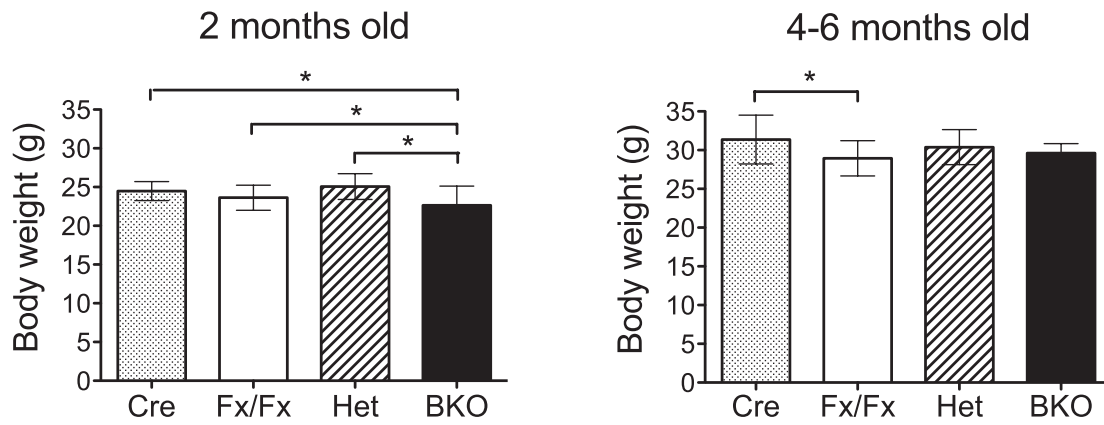

## Female Body Weights

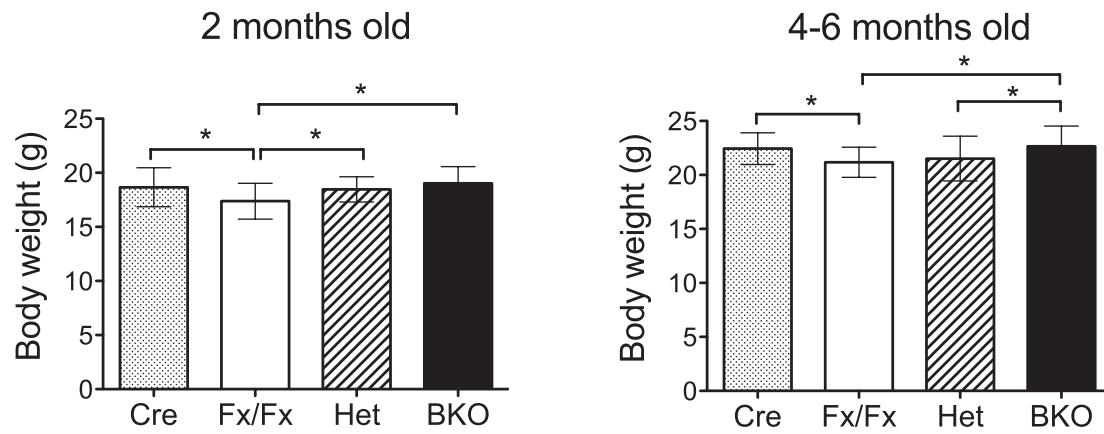

Supplement: supp [file elife-04617-supp-v1.zip]
